# Supplementary material for: Consistency as a Signal of Skills
Source: Atypon-hosted journal article supplement (doi:10.1287/mnsc.2016.2459), 2016-06-20
Supplement: mnsc.2016.2459-sm-data.zip [file samplesize.pdf › samplesize.pdf]

## “Consistency as a Signal of Skills”

Armin Falk and Florian Zimmermann

*All measures collected and all treatment variations conducted are part of the dataset. No data has been excluded. Sample sizes for the main treatments were determined using simple power analysis and from comparable studies in the related literature. (Final sample sizes were of course influenced by participant non-shows in the respective sessions.)*
